# Supplementary material for: Prediction of Clinically Significant Cancer Using Radiomics Features of Pre-Biopsy of Multiparametric MRI in Men Suspected of Prostate Cancer
Source: MDPI journal article supplement (doi:10.3390/cancers13246199), 2021-12-09
Supplement: s1 [file s1]

# Supplementary Materials: Prediction of Clinically Significant Cancer Using Radiomics Features of Pre-Biopsy of Multiparametric MRI in Men Suspected of Prostate Cancer

Chidozie N. Ogbonnaya, Xinyu Zhang, Basim S. O. Alsaedi, Norman Pratt, Yilong Zhang, Lisa Johnston and Ghulam Nabi

**Table S1.** Holm-Bonferroni adjustment following Kruskal-Wallis test.

| Obs.tot | Obs group | df | statistic | p-value   | holmBonf  | Variance               |
|---------|-----------|----|-----------|-----------|-----------|------------------------|
| 200     | 3         | 2  | 77.05261  |           |           |                        |
| 200     | 3         | 2  | 40.29552  | 1.855E-17 | 4.08E-16  | SumVarianceT2WI        |
| 200     | 3         | 2  | 30.26405  | 1.778E-09 | 3.734E-08 | SumEntropyT2WI         |
| 200     | 3         | 2  | 22.04339  | 2.681E-07 | 5.361E-06 | EntropyADC             |
| 200     | 3         | 2  | 20.48376  | 1.634E-05 | 0.000311  | SumEntropyADC          |
| 200     | 3         | 2  | 19.79669  | 3.565E-05 | 0.000642  | DifferenceEntropyT2WI  |
| 200     | 3         | 2  | 18.80068  | 5.026E-05 | 0.000854  | SumSquareVarianceT2WI  |
| 200     | 3         | 2  | 16.69491  | 8.27E-05  | 0.001323  | SumSquareVarianceADC   |
| 200     | 3         | 2  | 16.5606   | 0.000237  | 0.003555  | CorrelationADC         |
| 200     | 3         | 2  | 14.46591  | 0.000253  | 0.003555  | ContrastT2WI           |
| 200     | 3         | 2  | 13.56251  | 0.000722  | 0.009391  | DifferenceVarianceT2WI |
| 200     | 3         | 2  | 13.53896  | 0.001135  | 0.013618  | AngularSecMomT2WI      |
| 200     | 3         | 2  | 10.48425  | 0.001148  | 0.013618  | DifferenceVarianceADC  |
| 200     | 3         | 2  | 10.31543  | 0.005289  | 0.05289   | ContrastADC            |
| 200     | 3         | 2  | 10.26487  | 0.005755  | 0.05289   | SumAverageADC          |
| 200     | 3         | 2  | 10.22021  | 0.005902  | 0.05289   | EntropyT2WI            |
| 200     | 3         | 2  | 9.150617  | 0.006035  | 0.05289   | InverseDifferenceADC   |
| 200     | 3         | 2  | 7.67837   | 0.010303  | 0.061819  | AngSecMomADC           |
| 200     | 3         | 2  | 7.555213  | 0.021511  | 0.107556  | SumAverageT2WI         |
| 200     | 3         | 2  | 5.623613  | 0.022877  | 0.107556  | InverseDifferenceT2WI  |
| 200     | 3         | 2  | 4.792758  | 0.060096  | 0.180289  | CorrelationT2WI        |
| 200     | 3         | 2  | 3.085075  | 0.091047  | 0.182094  | SumVarianceADC         |
| 200     | 3         | 2  |           | 0.213838  | 0.213838  | DifferentEntropyADC    |

**Table S2:** Patients characteristics (n=200).

|           | S/N      | AGE      | PSA      | Volume   | PSAD     | Significant Gleason score | PIRADS   |
|-----------|----------|----------|----------|----------|----------|---------------------------|----------|
| Stand dev | 57.86312 | 6.262884 | 4.984889 | 29.19453 | 0.115035 | 0.481205                  | 0.666583 |
| Mean      | 100.49   | 63.82    | 11.085   | 66.84475 | 0.19     | 0.64                      | 4.589474 |
| n         | 200      | 200      | 200      | 200      | 200      | 200                       | 200      |
| Median    | 100.5    | 64       | 10.25    | 59.75    | 0.16     | 1                         | 5        |
| Minimum   | 1        | 45       | 1.1      | 20       | 0.01     | 0                         | 2        |
| Maximum   | 200      | 75       | 21       | 207      | 0.56     | 1                         | 5        |

**Table S3.** GLCM T2WI texture features showing the Standard deviation, mean, number, median, minimum, and maximum.

| AngularSec MomT2WI | Contrast tT2WI | Correlation onT2WI | SumSquareVarianceT2WI | InverseDifferenceT2WI | SumAverageT2WI | SumVarianceT2WI | SumEntropyT2WI | EntropyT2WI | DifferenceVarianceT2WI | DifferenceEntropyT2WI |
|--------------------|----------------|--------------------|-----------------------|-----------------------|----------------|-----------------|----------------|-------------|------------------------|-----------------------|
| 0.150208           | 25.60642       | 0.181285           | 27.0797               | 0.179048              | 12.7754        | 13.19336        | 4.176457       | 1.149206    | 9.765953               | 1.348403              |
| 0.4005             | 52.36          | 0.5505             | 73.42                 | 0.3235                | 67.015         | 41.975          | 3.8455         | 2.623       | 40.445                 | 3.051                 |
| 200                | 200            | 200                | 200                   | 200                   | 200            | 200             | 200            | 200         | 200                    | 200                   |
| 0.4                | 50             | 0.6                | 75.5                  | 0.2                   | 65             | 40.5            | 3.5            | 2.4         | 41                     | 3.1                   |
| 0.1                | 15             | 0.2                | 20                    | 0.1                   | 20             | 10              | 1.1            | 1           | 20                     | 1.1                   |
| 0.9                | 188            | 0.9                | 146                   | 0.9                   | 99             | 80              | 44             | 6.1         | 57                     | 7.2                   |

**Table S4.** GLCM ADC texture features showing the Standard deviation, mean, number, median, minimum and maximum.

| AngularSecMomADC | Contrast tADC | Correlation onADC | SumSquareVarianceADC | InverseDifferenceADC | SumAverageADC | SumVarianceADC | SumEntropyADC | EntropyADC | DifferenceVarianceADC | DifferenceEntropyADC |
|------------------|---------------|-------------------|----------------------|----------------------|---------------|----------------|---------------|------------|-----------------------|----------------------|
| 0.739036         | 18.50003      | 0.222127          | 17.92867             | 0.191422             | 20.40981      | 16.66998       | 0.964133      | 1.039752   | 9.070676              | 1.166338             |
| 0.7575           | 50.49         | 0.4675            | 74.745               | 0.329                | 39.55         | 41.785         | 2.686         | 1.961      | 29.435                | 2.0825               |
| 200              | 200           | 200               | 200                  | 200                  | 200           | 200            | 200           | 200        | 200                   | 200                  |
| 0.4              | 47            | 0.4               | 80                   | 0.3                  | 36.5          | 40             | 2.6           | 1.4        | 27                    | 1.5                  |
| 0.1              | 18            | 0.1               | 40                   | 0.1                  | 6             | 10             | 1             | 1          | 10                    | 1                    |
| 3.9              | 94            | 0.9               | 107                  | 0.9                  | 93            | 93             | 5             | 5.6        | 50                    | 5                    |

**Table S5.** Description of Gray-level co-occurrence Metrix (GLCM) features computed within the region of interest (ROI) of prostate tumour.

| Texture Features (2 <sup>nd</sup> order statistic Characterizing spatial relationship between intensity values within ROIs). | Description                                                                                                                              |
|------------------------------------------------------------------------------------------------------------------------------|------------------------------------------------------------------------------------------------------------------------------------------|
| Angular Second moment                                                                                                        | Measures the textural uniformity that is pixel pair recurrences. It detects disorder in textures                                         |
| Contrast                                                                                                                     | Measures local intensity variations                                                                                                      |
| Correlation                                                                                                                  | Explains the linear dependency of Grey level values to their respective voxels in the GLCM                                               |
| Sum Square Variance                                                                                                          | Measures the distribution of neighbouring intensity level pairs about the average of intensity level in the GLCM                         |
| Inverse Difference                                                                                                           | Measures of the local homogeneity of an image                                                                                            |
| Sum Average                                                                                                                  | Measures the relationship between occurrences of pairs with lower intensity values and occurrences of pairs with higher intensity values |
| Sum Variance                                                                                                                 | Explains the weights elements that differ from the average value of the GLCM.                                                            |
| Sum Entropy                                                                                                                  | Explains the sum of neighbourhood intensity value differences.                                                                           |
| Entropy                                                                                                                      | Explains the randomness in the GLCM                                                                                                      |
| Difference Variance                                                                                                          | Measure of heterogeneity that places higher weights on differing intensity level pairs that deviate more from the mean.                  |
| Difference Entropy                                                                                                           | Measure of the randomness/variability in neighbourhood intensity value differences.                                                      |
